# Supplementary material for: Solvent quality and nonbiological oligomer folding: revisiting conventional paradigms
Source: Royal Society of Chemistry journal article supplement (doi:10.1039/d4sm00727a), 2024-01-01
Supplement: d4sm00727a1.pdf [file d4sm00727a1.pdf]

# Solvent Quality and Nonbiological Oligomer Folding: Revisiting Conventional Paradigms

## Supplementary Information

Cedrix J. Dongmo Fomthuil,<sup>\*,†,‡</sup> Tobia Arcangeli,<sup>†,¶</sup> Tatjana Škrbić,<sup>†</sup> and  
Achille Giacometti<sup>\*,†,§</sup>

<sup>†</sup>*Dipartimento di Scienze Molecolari e Nanosistemi, Università Ca' Foscari Venezia, Via  
Torino 155, 30172, Mestre, Venezia, Italy*

<sup>‡</sup>*INFN, Sezione di Roma Tor Vergata, Via della Ricerca Scientifica 1, 00133 Roma, Italy*

<sup>¶</sup>*Dipartimento di Chimica, Materiali e Ingegneria Chimica "Giulio Natta", Politecnico di  
Milano, Sede Leonardo Edificio 6, Piazza Leonardo da Vinci 32, I-20133 Milano, Italy*

<sup>§</sup>*European Centre for Living Technology (ECLT) Ca' Bottacin, Dorsoduro 3911, Calle  
Crosera 30123 Venice, Italy*

E-mail: cedrix85@gmail.com, cedrix.dongmo@unive.it; achille@unive.it

Table SI: Solvent characteristics.

| Solvents                                         | Dielectric constants $\epsilon$ | Characteristic length $\text{\AA}$ |
|--------------------------------------------------|---------------------------------|------------------------------------|
| Water H <sub>2</sub> O                           | 80.04                           | 1.515                              |
| Acetonitrile MeCN                                | 37.5                            | 3.00                               |
| Chloroform CHCl <sub>3</sub>                     | 4.81                            | 2.56                               |
| Cyclohexane cC <sub>6</sub> H <sub>12</sub>      | 2.02                            | 5.80                               |
| <i>n</i> -hexane nC <sub>6</sub> H <sub>14</sub> | 1.88                            | 6.34                               |

Table SII: Enthalpic and entropic contributions to the solvation free energies ( $\text{kJ mol}^{-1}$ ) for different polymer length *12mer*, *16mer*, and *20mer* in the three solvents used water  $\text{H}_2\text{O}$ , cyclohexane  $\text{cC}_6\text{H}_{12}$  and n-hexane  $\text{nC}_6\text{H}_{14}$  at  $25^\circ\text{C}$ .

| Solvent                    | Oligomer | $\Delta\text{G}$    | $\Delta\text{H}$     | $-\text{T}\Delta\text{S}$ |
|----------------------------|----------|---------------------|----------------------|---------------------------|
| $\text{H}_2\text{O}$       | 12mer    | $-2751.16 \pm 2.53$ | $-3317.34 \pm 1.40$  | $566.18 \pm 15.96$        |
|                            | 16mer    | $-3766.96 \pm 1.87$ | $-4474.23 \pm 4.44$  | $707.27 \pm 21.97$        |
|                            | 20mer    | $-4714.84 \pm 2.47$ | $-5583.89 \pm 5.52$  | $869.05 \pm 28.24$        |
| $\text{nC}_6\text{H}_{14}$ | 12mer    | $-2834.90 \pm 1.65$ | $-3495.28 \pm 7.39$  | $660.38 \pm 20.69$        |
|                            | 16mer    | $-3860.16 \pm 3.17$ | $-4691.91 \pm 10.92$ | $831.75 \pm 24.30$        |
|                            | 20mer    | $-4821.46 \pm 1.26$ | $-5962.94 \pm 14.37$ | $1141.47 \pm 32.59$       |
| $\text{cC}_6\text{H}_{12}$ | 12mer    | $-2047.25 \pm 3.62$ | $-2093.73 \pm 12.39$ | $46.47 \pm 29.71$         |
|                            | 16mer    | $-2796.44 \pm 4.17$ | $-2957.97 \pm 17.52$ | $161.54 \pm 35.30$        |
|                            | 20mer    | $-3484.41 \pm 2.44$ | $-3739.65 \pm 31.86$ | $255.24 \pm 50.83$        |

Table SIII: Enthalpic and entropic contributions to the transfer free energies ( $\text{kJ mol}^{-1}$ ) from water  $\text{H}_2\text{O}$  to cyclohexane  $\text{cC}_6\text{H}_{12}$  and from water  $\text{H}_2\text{O}$  to n-hexane  $\text{nC}_6\text{H}_{14}$  for different polymer length investigated here at  $25^\circ\text{C}$ .

|                        | Oligomers | $\Delta\Delta\text{G}$ | $\Delta\Delta\text{H}$ | $-\text{T}\Delta\Delta\text{S}$ |
|------------------------|-----------|------------------------|------------------------|---------------------------------|
| $\Delta\Delta G_{w>h}$ | 12mer     | $-83.74 \pm 4.18$      | $-177.94 \pm 8.79$     | $94.2 \pm 36.65$                |
|                        | 16mer     | $-93.2 \pm 5.04$       | $-217.68 \pm 15.36$    | $124.48 \pm 46.27$              |
|                        | 20mer     | $-106.62 \pm 3.73$     | $-379.05 \pm 19.89$    | $272.42 \pm 60.83$              |
| $\Delta\Delta G_{w>c}$ | 12mer     | $703.91 \pm 6.15$      | $1223.61 \pm 13.79$    | $-519.71 \pm 45.67$             |
|                        | 16mer     | $970.52 \pm 6.04$      | $1516.26 \pm 21.96$    | $-545.74 \pm 57.27$             |
|                        | 20mer     | $1230.43 \pm 4.91$     | $1844.24 \pm 37.38$    | $-613.81 \pm 79.07$             |

Table SIV: Fitting coefficients,  $a$ ,  $b$  and  $c$  used to compute the hydration thermodynamics parameters along with their Pearson's correlation coefficients  $R^2$ .

| Solvents                   | Oligomers | $a$           | $b$         | $c$         | $R^2$     |
|----------------------------|-----------|---------------|-------------|-------------|-----------|
| $\text{H}_2\text{O}$       | 12mer     | $-3771.02341$ | $12.09052$  | $-1.52167$  | $0.97694$ |
|                            | 16mer     | $-2323.17397$ | $-45.94891$ | $-45.94891$ | $0.99460$ |
|                            | 20mer     | $-5233.94976$ | $-4.94615$  | $1.17369$   | $0.99770$ |
| $\text{nC}_6\text{H}_{14}$ | 12mer     | $-5036.00406$ | $36.82547$  | $-5.16760$  | $0.99135$ |
|                            | 16mer     | $-2547.90165$ | $-45.37304$ | $7.19105$   | $0.99273$ |
|                            | 20mer     | $-5833.73501$ | $0.92616$   | $0.43334$   | $0.98644$ |
| $\text{cC}_6\text{H}_{12}$ | 12mer     | $-1103.28532$ | $-22.09331$ | $3.32196$   | $0.83359$ |
|                            | 16mer     | $-4239.92131$ | $29.33924$  | $-4.29966$  | $0.86636$ |
|                            | 20mer     | $-755.54073$  | $-66.17863$ | $10.00877$  | $0.87533$ |

Table SV: Summary of the slopes, intercepts to origin, and correlation coefficients for the linear fitting curves  $-T\Delta S = f(\Delta H)$  a.k.a enthalpy-entropy compensation in water  $\text{H}_2\text{O}$ , cyclohexane  $\text{cC}_6\text{H}_{12}$  and n-hexane  $\text{nC}_6\text{H}_{14}$  for pPA and polyPHE.

| Oligomers | Solvents                   | Slopes   | Intercepts origin | Correlation coefficients |
|-----------|----------------------------|----------|-------------------|--------------------------|
| pPA       | $\text{H}_2\text{O}$       | -0.13354 | 118.76581         | 0.99868                  |
|           | $\text{cC}_6\text{H}_{12}$ | -0.12695 | -217.61118        | 0.99955                  |
|           | $\text{nC}_6\text{H}_{14}$ | -0.19546 | -44.07187         | 0.98920                  |
| polyPHE   | $\text{H}_2\text{O}$       | -0.74689 | -151.72571        | 0.99185                  |
|           | $\text{cC}_6\text{H}_{12}$ | -0.10883 | 97.25740          | 0.94718                  |

## RDF

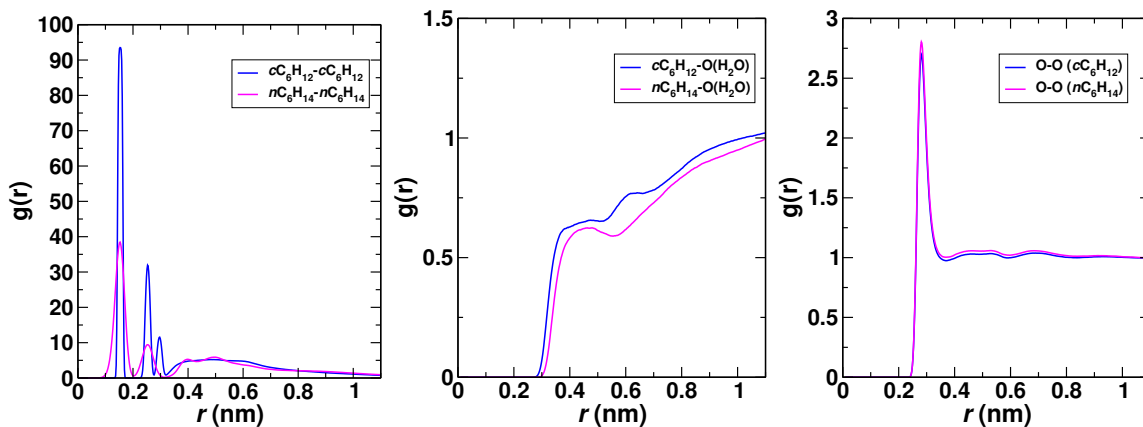

Figure SI: Site-site pair radial distribution functions computed for solute - solute (left), solute - water oxygen (middle), and water oxygen - water oxygen (right).  $\text{cC}_6\text{H}_{12}$  data are displayed in magenta while  $\text{nC}_6\text{H}_{14}$  counterparts are shown in blue.

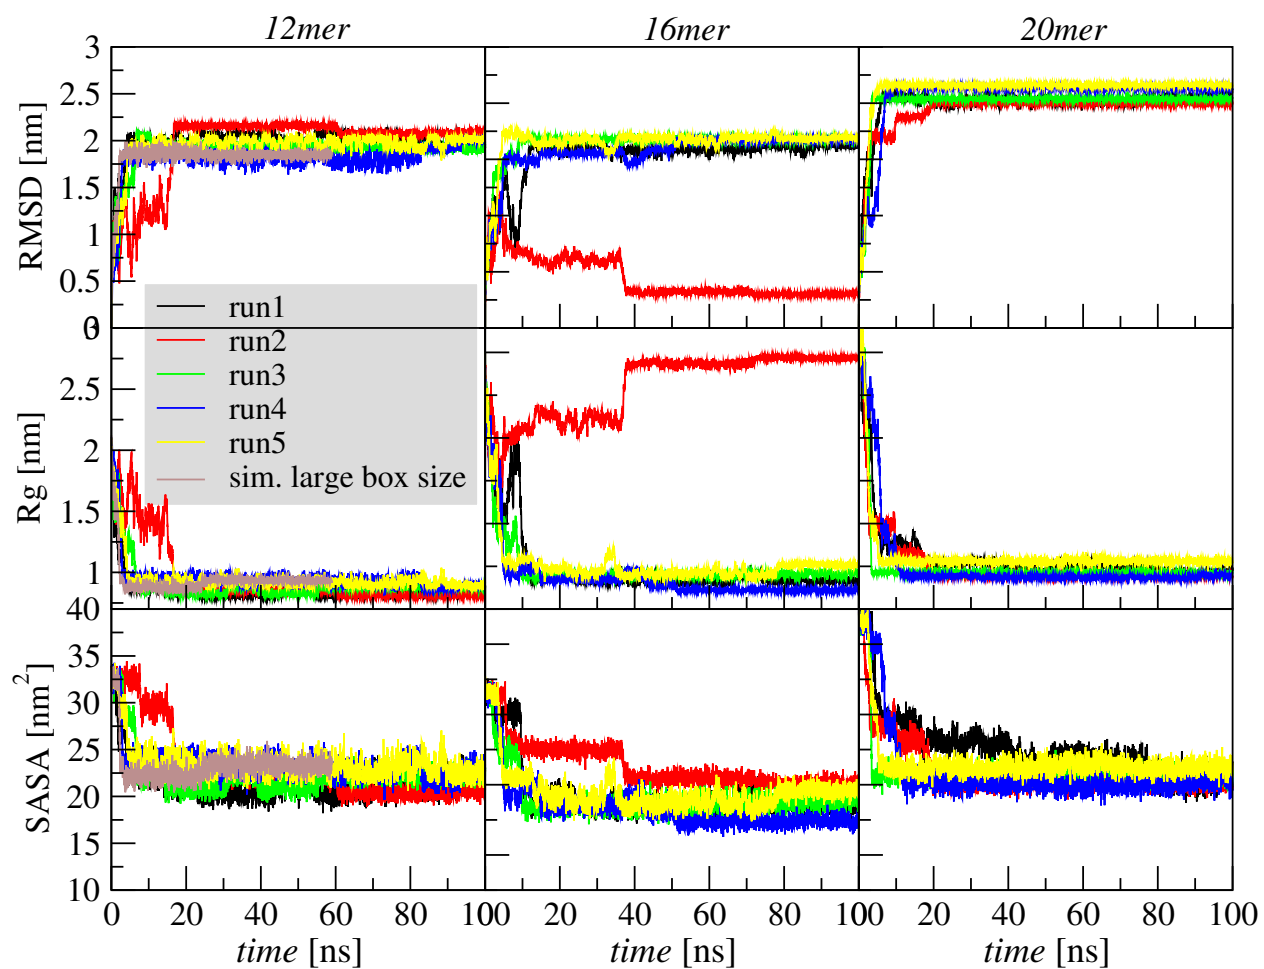

Figure SII: Folding trajectories of the pPA in water  $H_2O$ . From top to bottom the time-dependent changes of the RMSD, Rg and SASA are displayed, respectively. From left to right the changes in *12mer*, *16mer* and *20mer* oligomers are respectively shown.

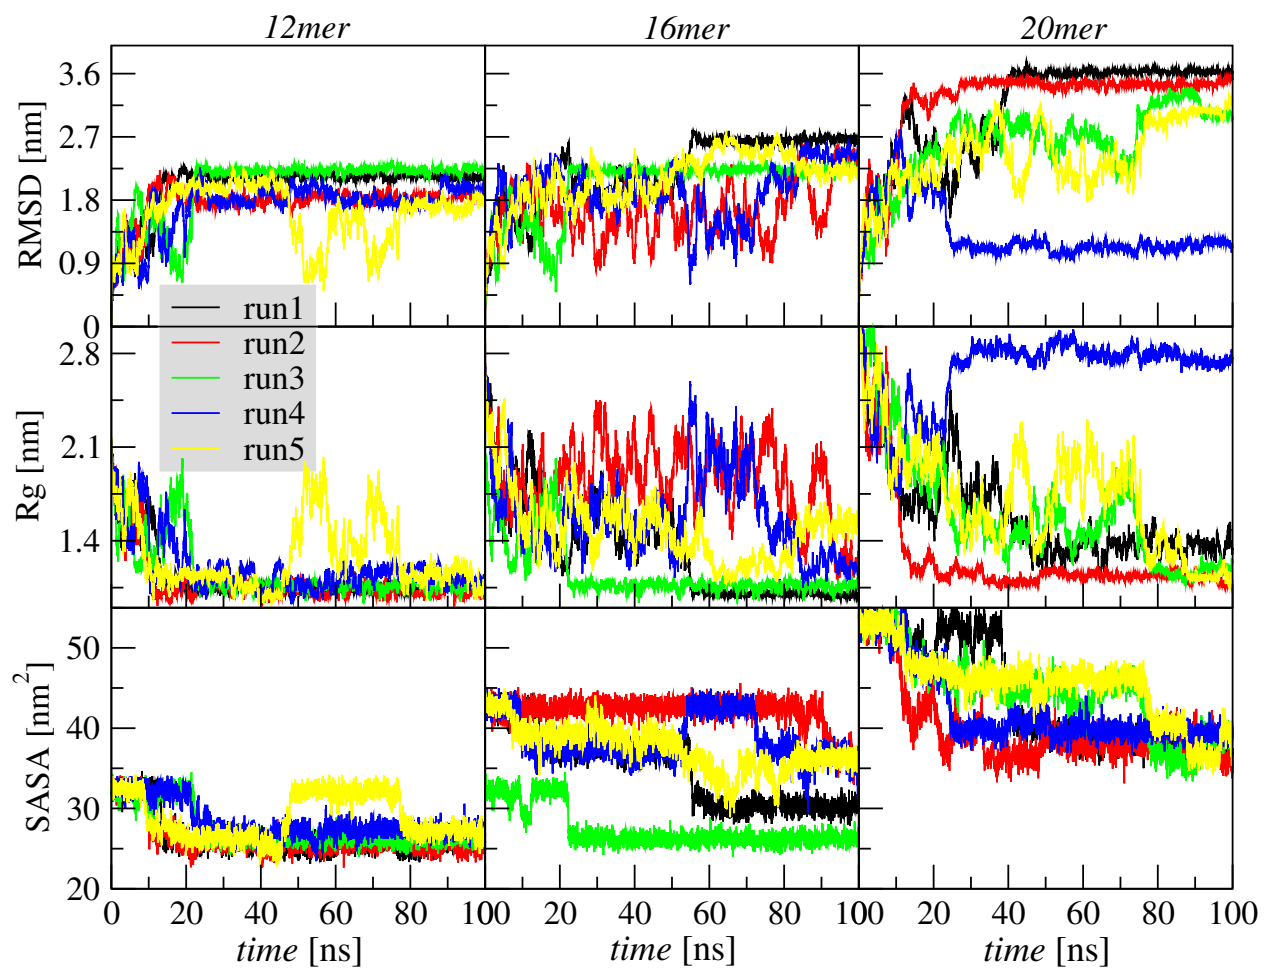

Figure SIII: Folding trajectories of pPA in cyclohexane  $cC_6H_{12}$ . From top to bottom the time-dependent changes of the RMSD, Rg and SASA are displayed, respectively. From left to right the changes in the oligomer length *12mer*, *16mer* and *20mer* are respectively shown.

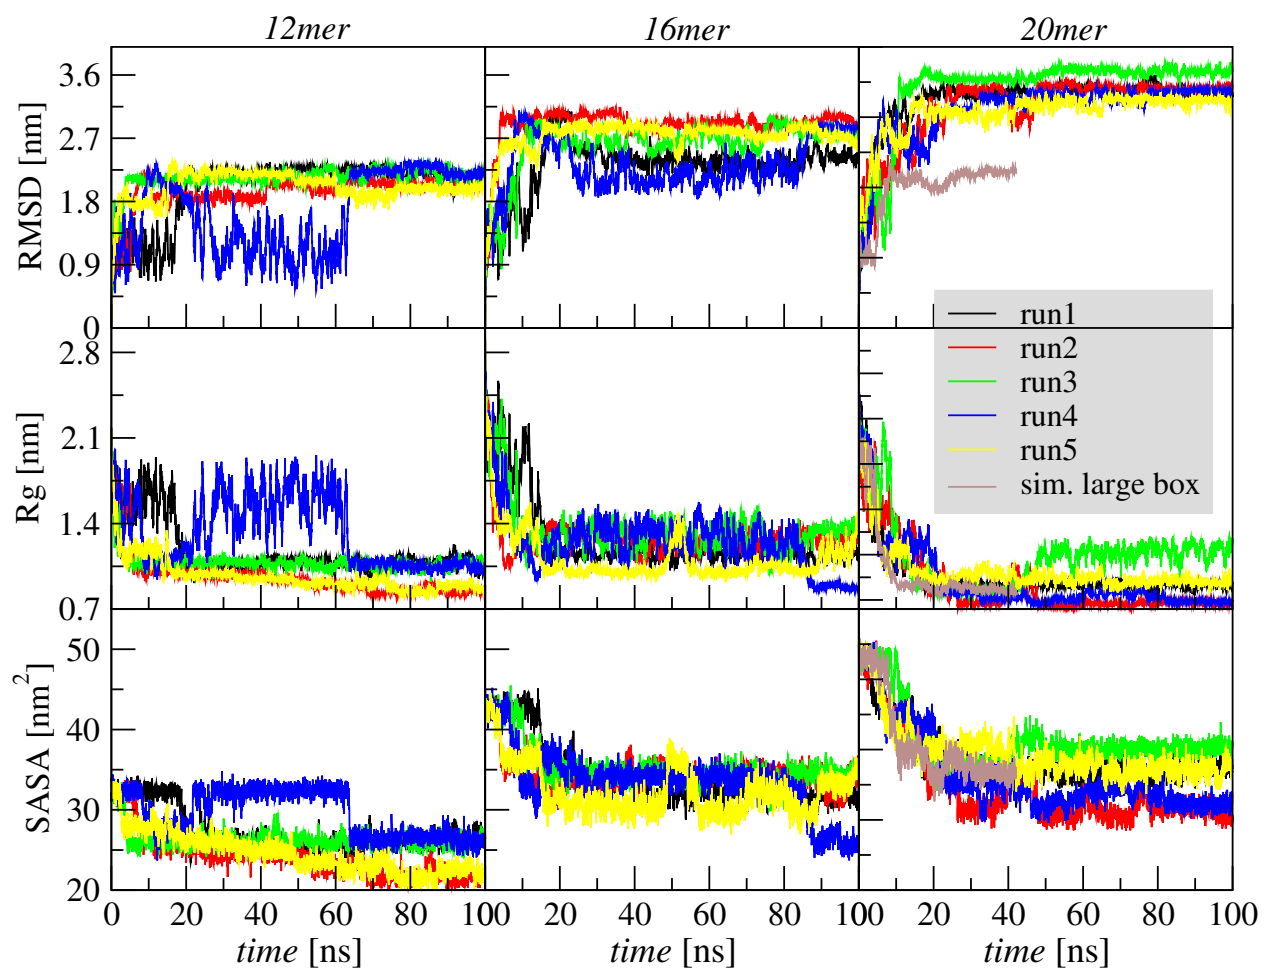

Figure SIV: Folding trajectories of pPA in *n*-hexane  $n\text{C}_6\text{H}_{14}$ . From top to bottom the time-based changes of the RMSD, Rg and SASA are displayed, respectively. From left to right the changes in oligomer length *12mer*, *16mer* and *20mer* are respectively shown.

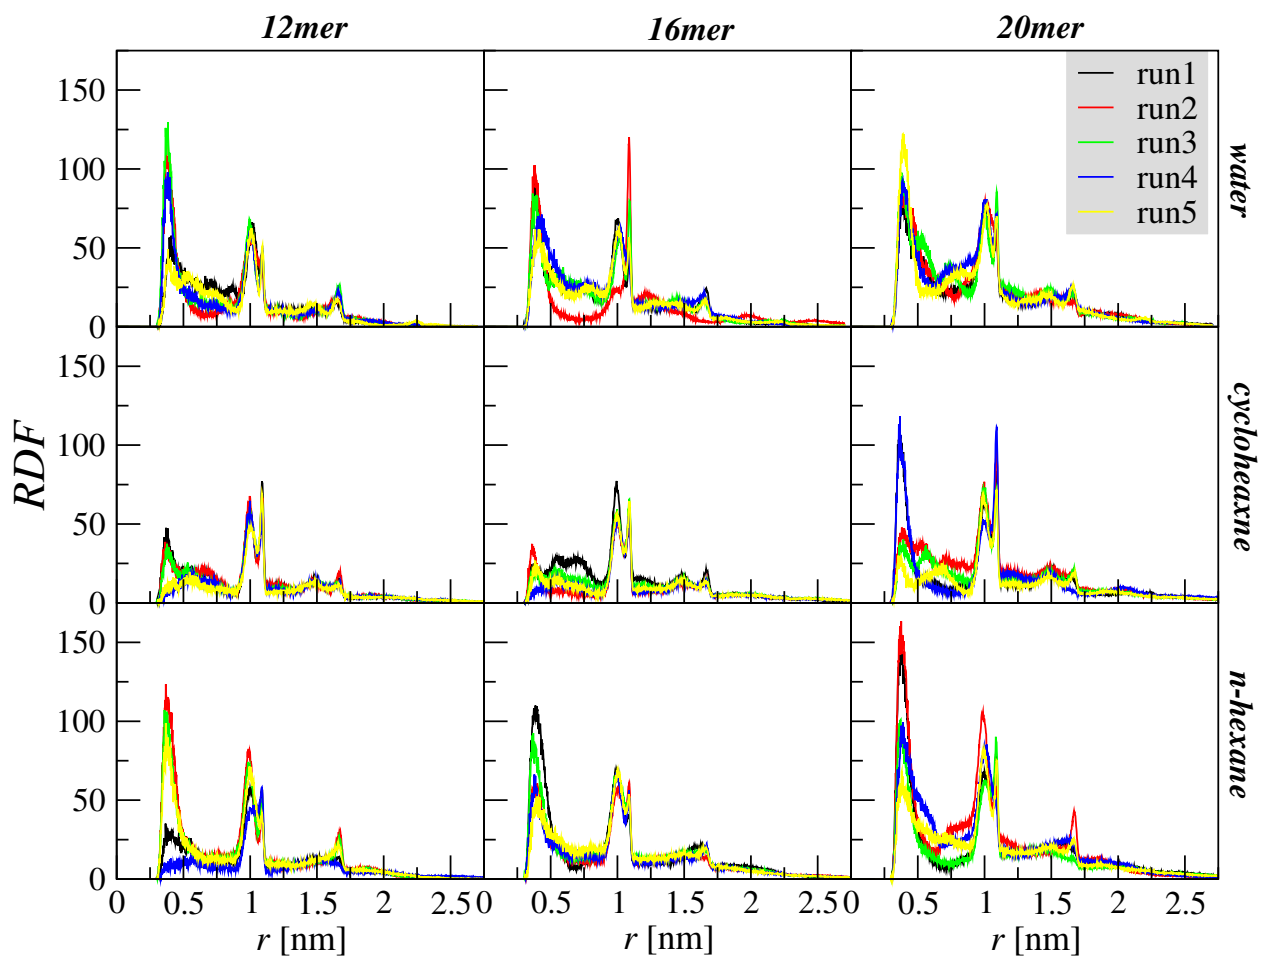

Figure SV: Intramolecular site-site pair radial distribution functions between carbon atoms of pPA methoxycarbonyl group in the three solvents  $\text{H}_2\text{O}$  (top), cyclohexane  $\text{C}_6\text{H}_{12}$  (middle) and *n*-hexane (bottom) studied here. From left to right the changes in oligomer length *12mer*, *16mer* and *20mer* are respectively shown. Different colour correspond to individual runs performed.

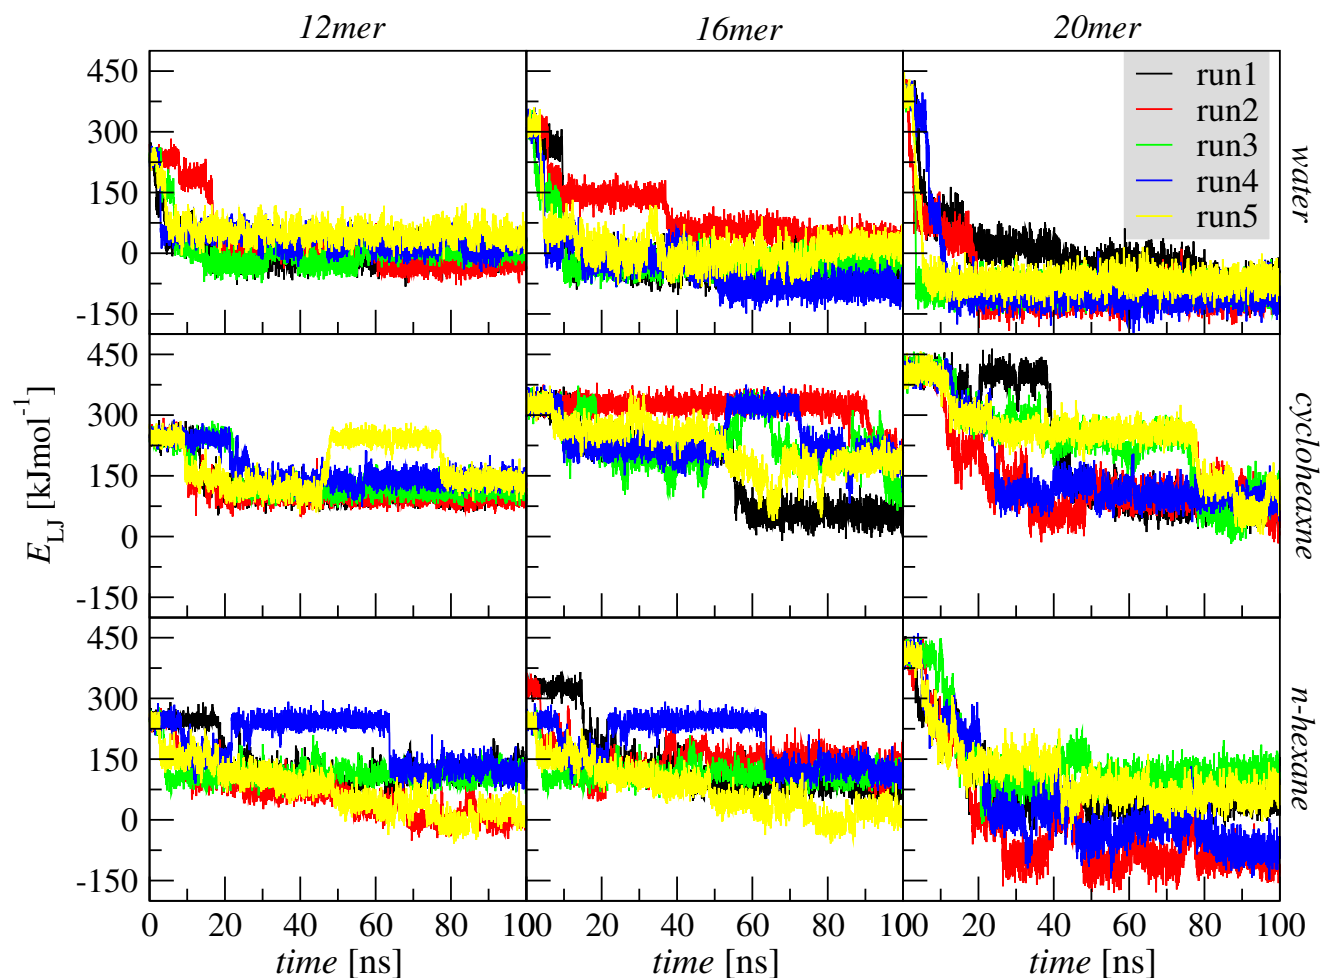

Figure SVI: Highlights of the self intramolecular Lenard-Jones non-covalent interaction energy along the simulation timescale. From top to bottom the changes recorded in water  $H_2O$ , cyclohexane  $cC_6H_{12}$ , and *n*-hexane  $nC_6H_{14}$ , respectively. From left to right the panels report on the oligomer's length-based results for *12mer*, *16mer*, and *20mer*, respectively. All the plots are on the same scale.



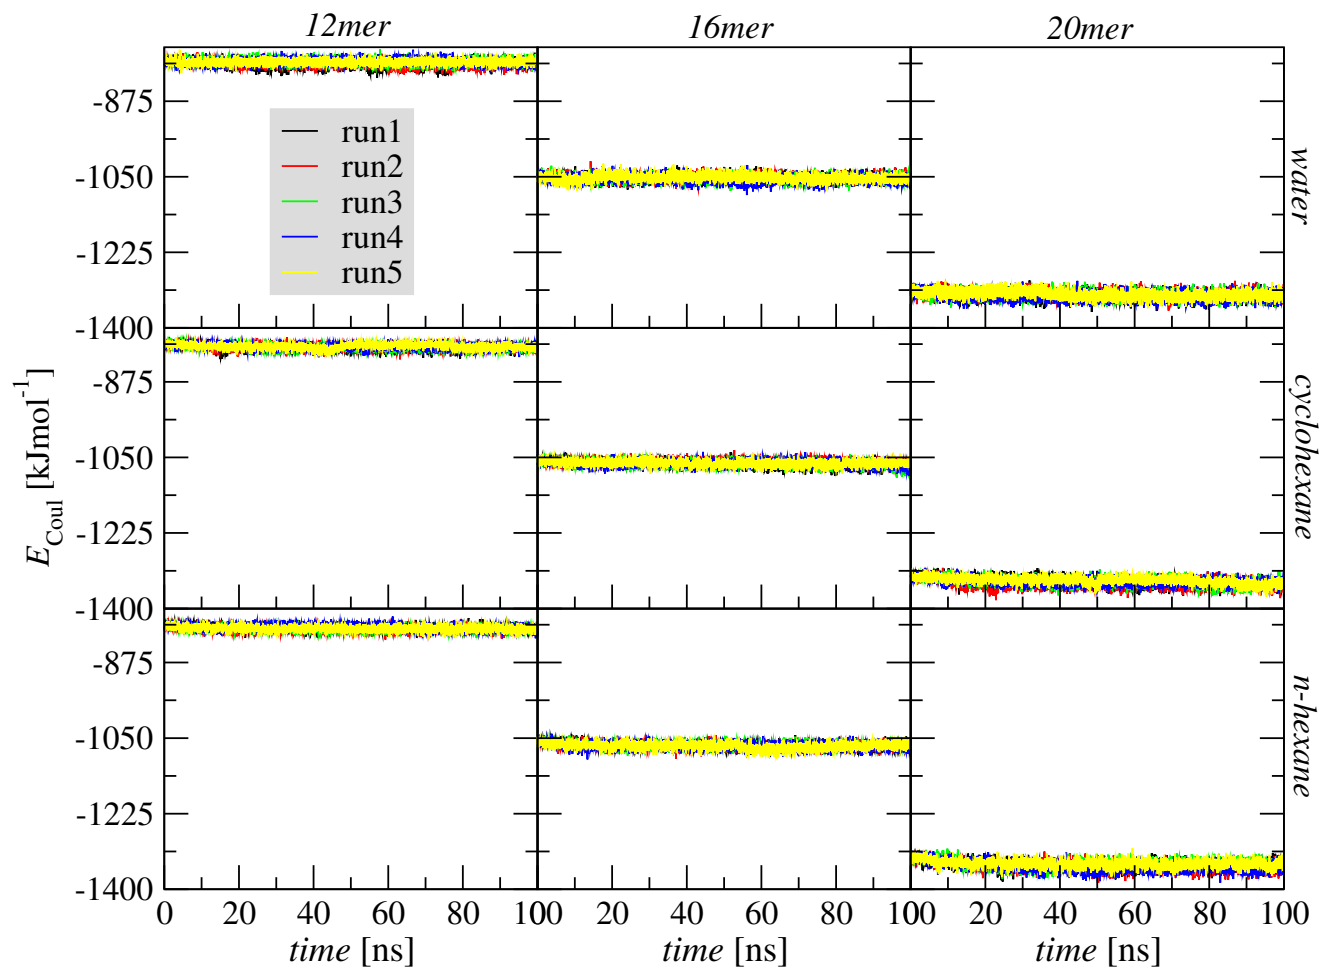

Figure SVII: Overview of the self intramolecular Coulombic non-covalent interaction energy along the simulation timescale. From top to bottom the changes recorded in water  $\text{H}_2\text{O}$ , cyclohexane  $\text{cC}_6\text{H}_{12}$ , and  $n$ -hexane  $\text{nC}_6\text{H}_{14}$ , respectively. From left to right the panels report on the oligomer's length-based results for  $12\text{mer}$ ,  $16\text{mer}$ , and  $20\text{mer}$ , respectively. All the plots are on the same scale.

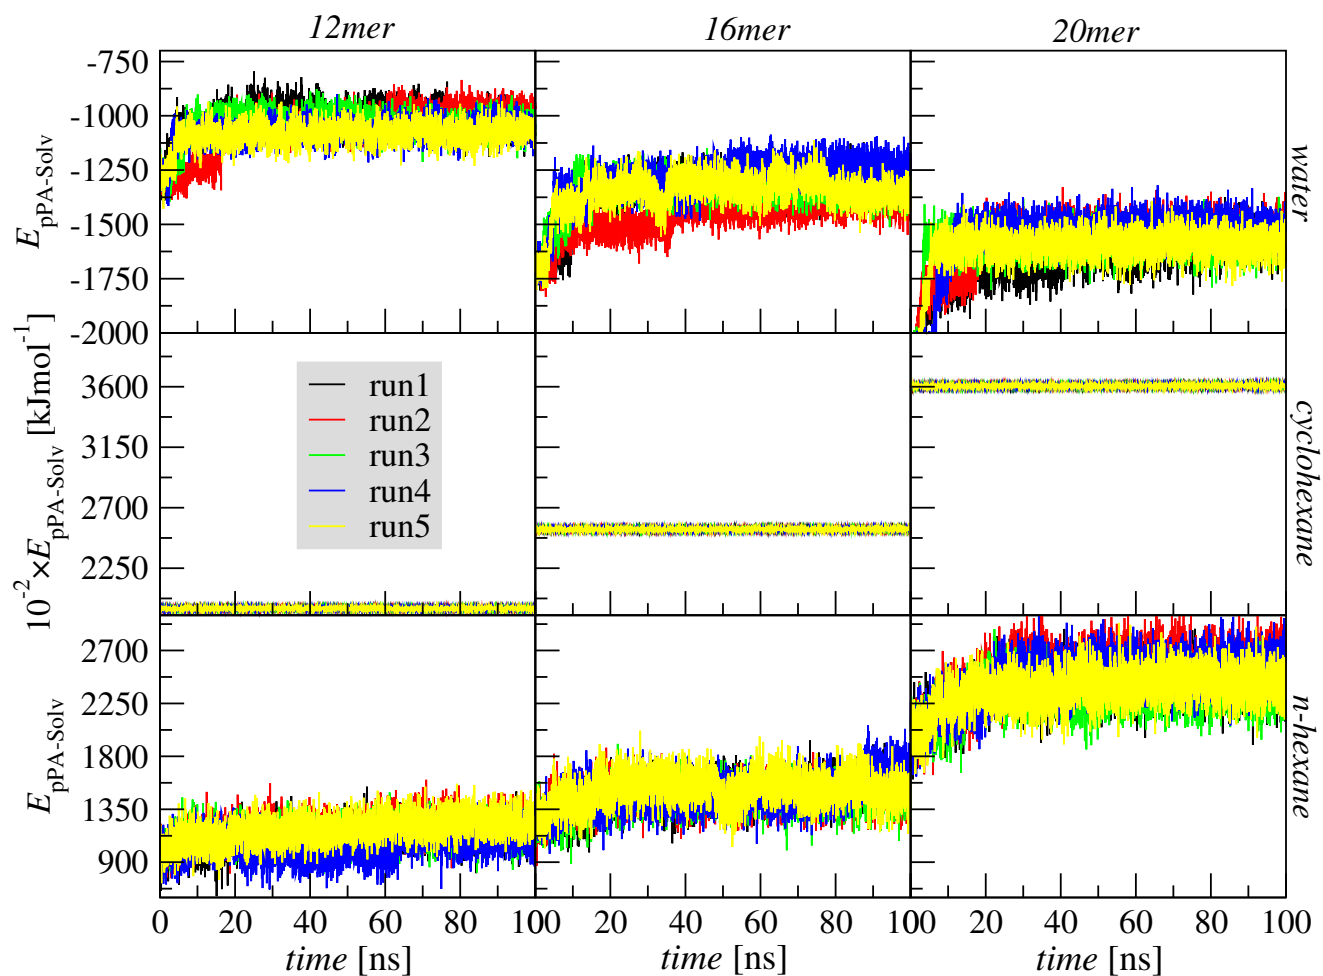

Figure SVIII: Panorama of the inter solute-solvent interaction energy changes with the simulation timescale. From top to bottom the changes computed in water  $\text{H}_2\text{O}$ , cyclohexane  $\text{cC}_6\text{H}_{12}$ , and *n*-hexane  $\text{nC}_6\text{H}_{14}$ , respectively. From left to right the views of the oligomer's length for *12mer*, *16mer*, and *20mer*, respectively. It should be noticed that each line is plotted on its own scale.

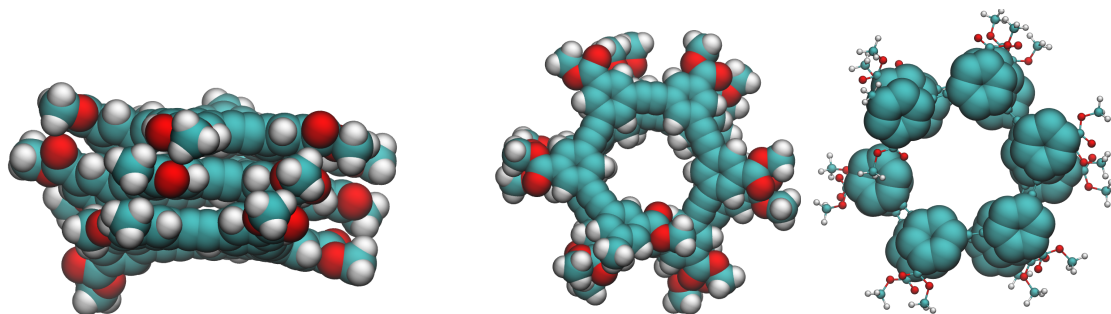

(a) Side view of the helical shape for  $16mer$ -pPA in  $cC_6H_{12}$ . (b) Top views of the helical shape for  $16mer$ -pPA in  $cC_6H_{12}$ .

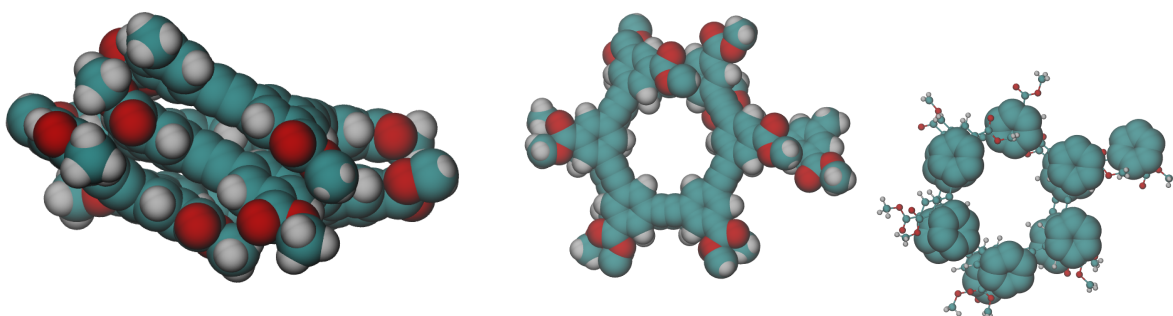

(c) Side view of the helical shape for  $12mer$ -pPA in  $H_2O$ . (d) Top views of the helical shape for  $12mer$ -pPA in  $H_2O$ .

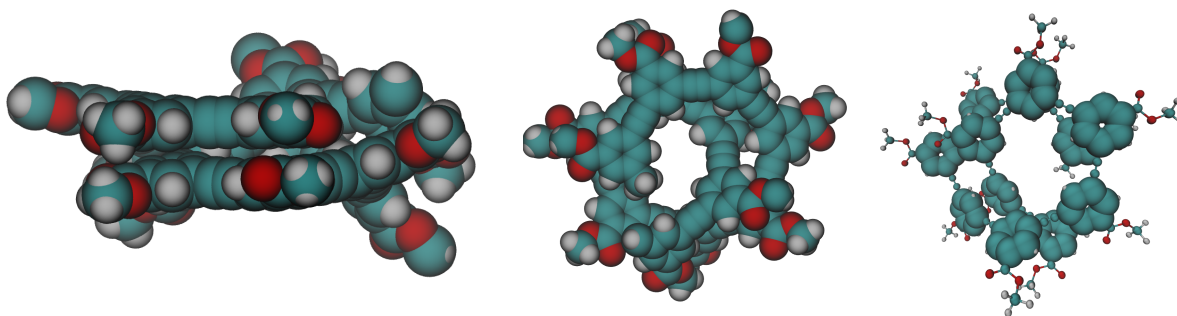

(e) Side view of the helical shape for  $12mer$ -pPA in  $H_2O$ . (f) Top views of the helical shape for  $12mer$ -pPA in  $H_2O$ .

Figure SIX: Close-up views of the best helical shapes obtained from the simulations of  $12mer$ -pPA in  $H_2O$  starting with two different conformations and of  $16mer$ -pPA in  $cC_6H_{12}$ . Different representations are displayed from side and top views to enable an in-depth view of the molecular arrangement and folded structures. In the latter top view, phenyl rings representing the core of each monomeric unit are explicitly shown.

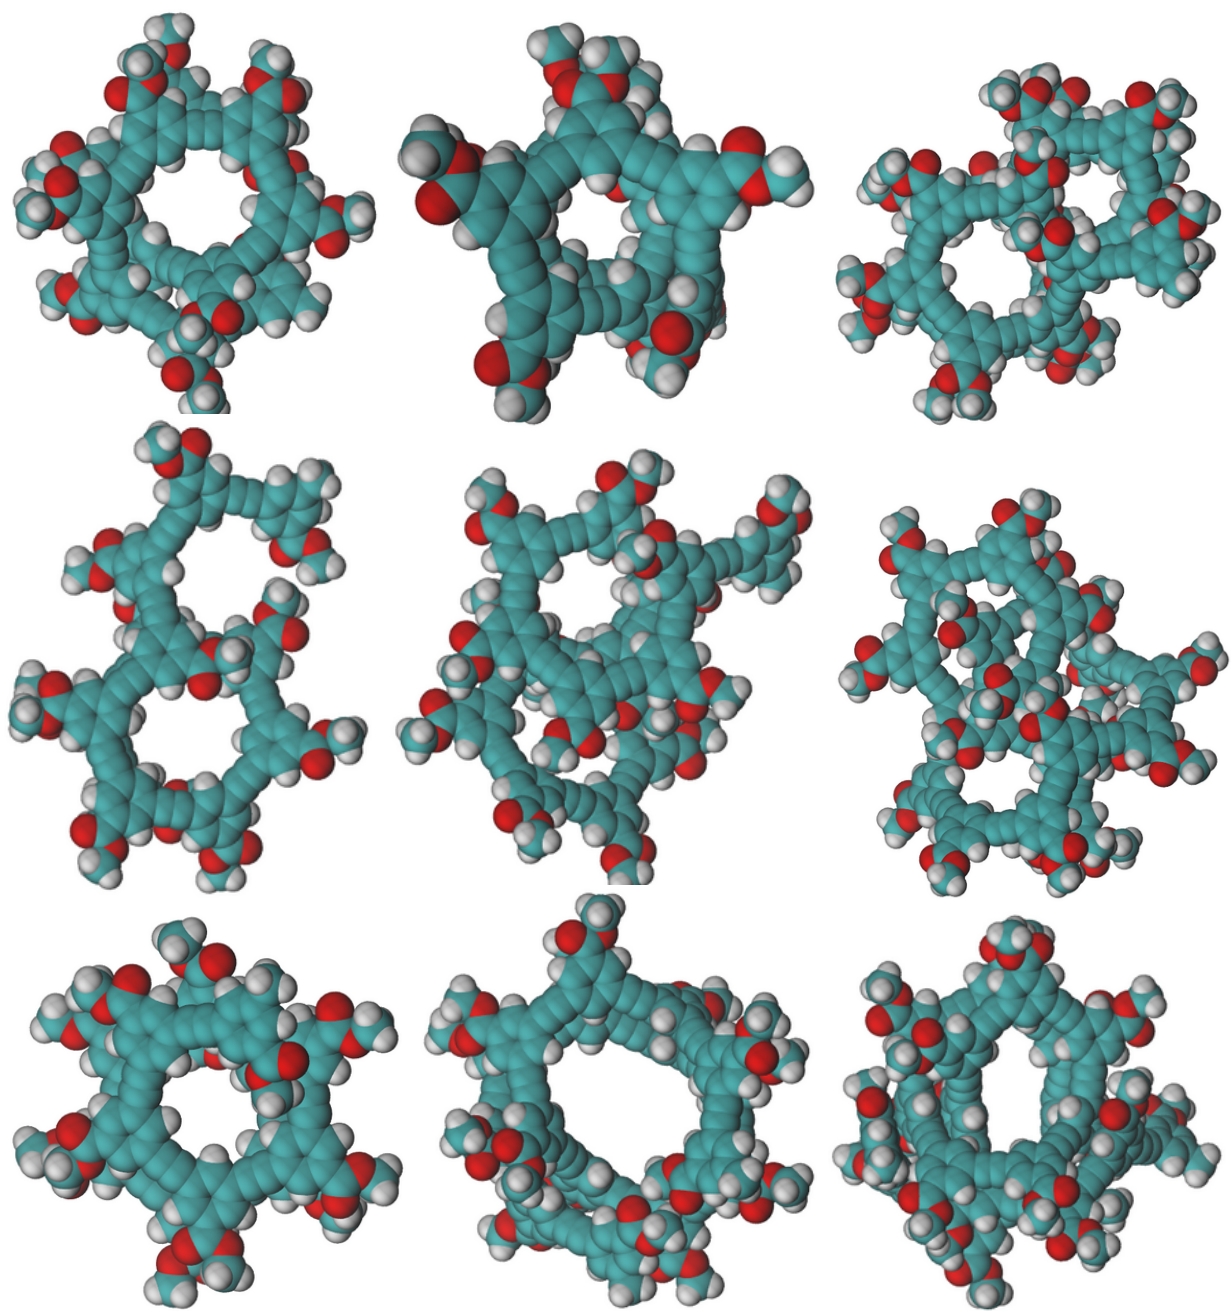

Figure SX: Representative structures of the most populated clusters found in the selected simulation trajectories. From top to bottom the structures identified in water  $\text{H}_2\text{O}$ , cyclohexane  $\text{cC}_6\text{H}_{12}$ , and *n*-hexane  $\text{nC}_6\text{H}_{14}$  are respectively shown. From left to right the snapshots of the *12mer*, *16mer* and *20mer* oligomers are presented, respectively.

## FES-WATER

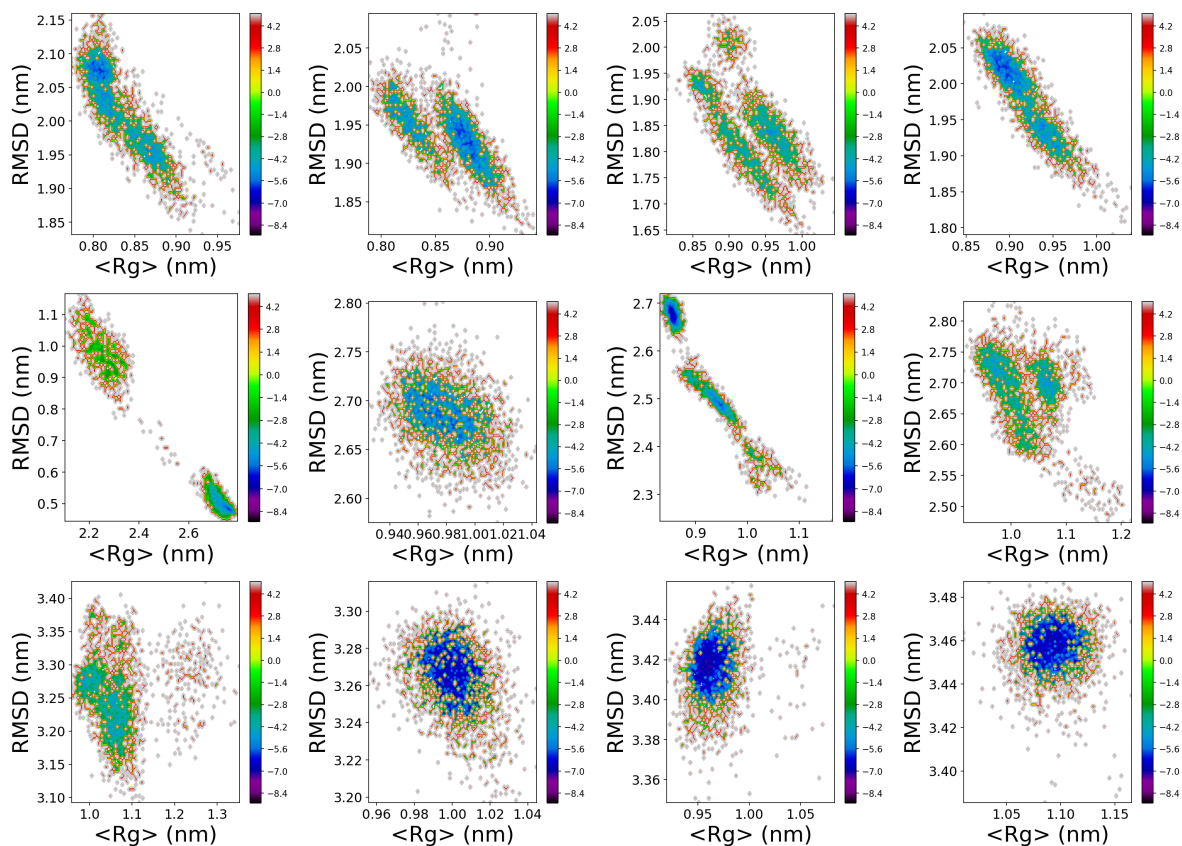

Figure SXI: Free Energy Surfaces (FES) of each of the oligomers used here in water  $H_2O$ . From top to bottom the FES for *12mer*, *16mer* and *20mer* oligomers, respectively. From left to right individual runs performed are displayed.

## FES-CHEX

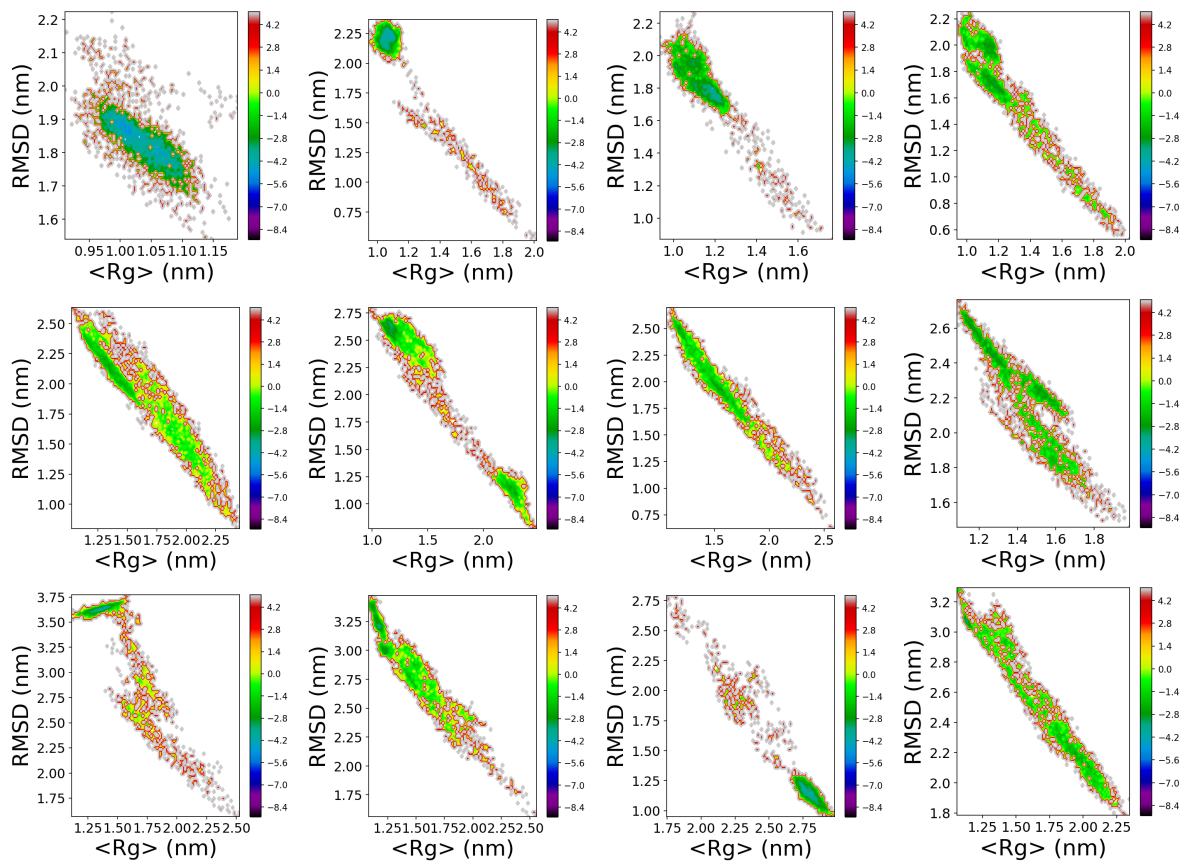

Figure SXII: Free Energy Surfaces (FES) of each of the oligomers used here in cyclohexane  $cC_6H_{12}$ . From top to bottom the FES for *12mer*, *16mer* and *20mer* oligomers, respectively. From left to right individual runs performed are displayed.

## FES-HEX

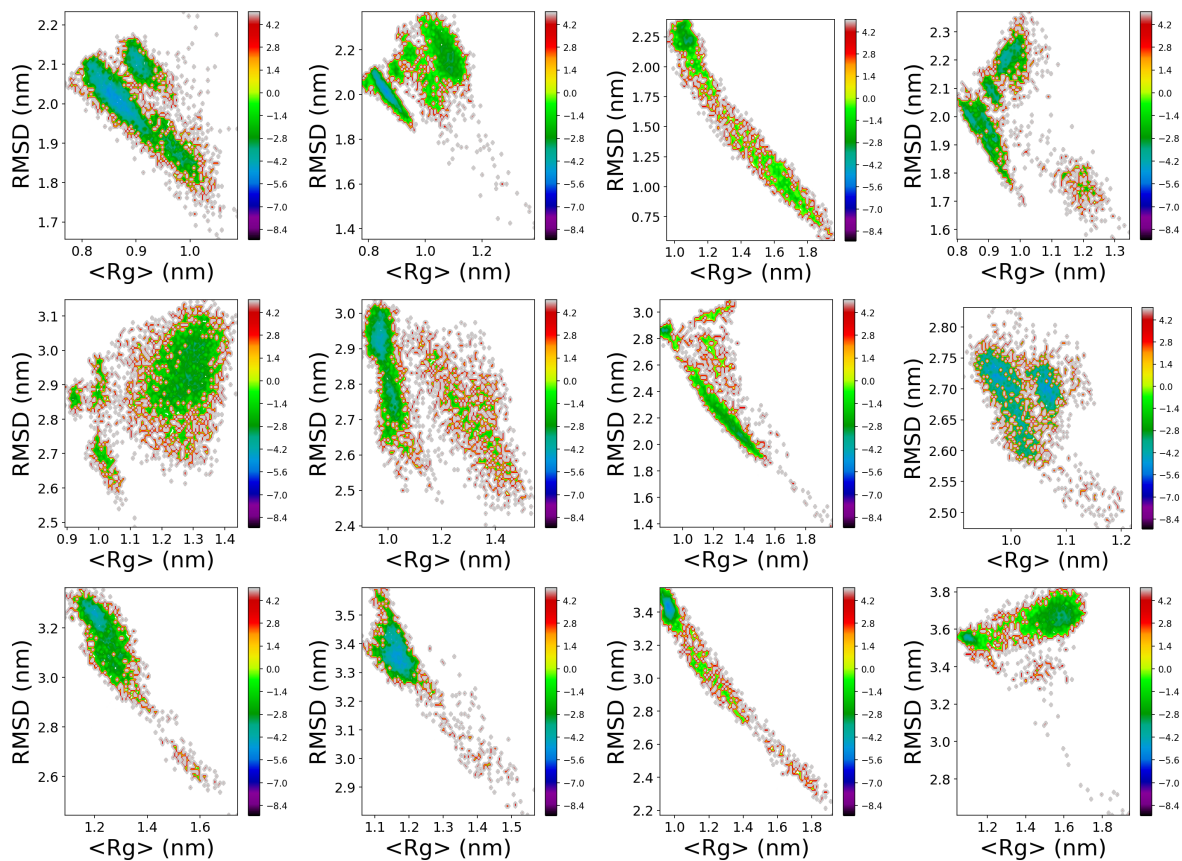

Figure SXIII: Free Energy Surfaces (FES) of each of the oligomers used here in  $n$ -hexane  $n\text{C}_6\text{H}_{14}$ . From top to bottom the FES for  $12\text{mer}$ ,  $16\text{mer}$  and  $20\text{mer}$  oligomers, respectively. From left to right the individual runs performed are displayed.

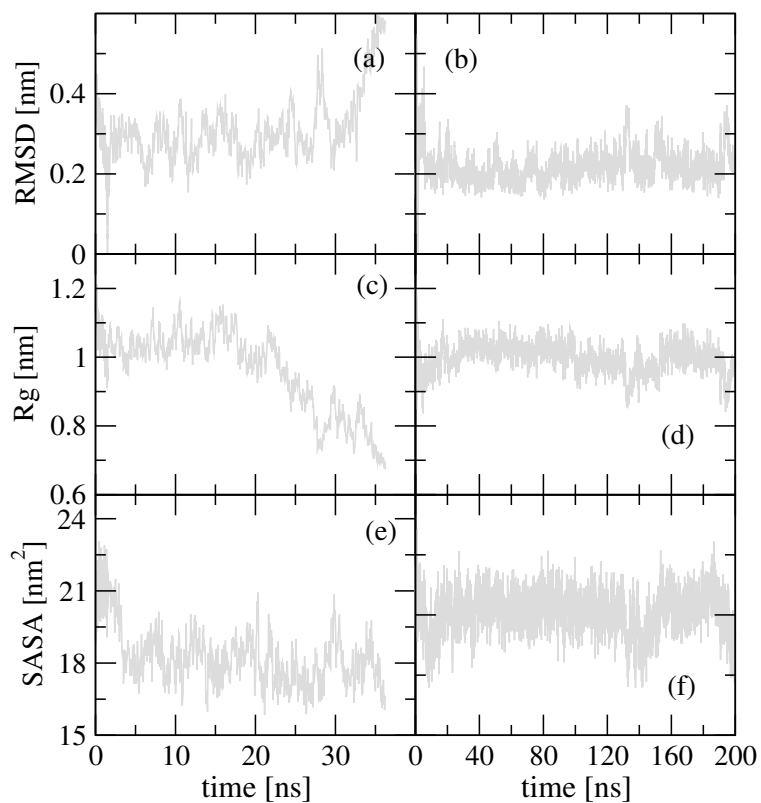

Figure SXIV: Conformational dynamics of unrestrained undecaphenylalanine in water (left) and in cyclohexane (right). Panels (a) and (b): root-mean-square-deviation (RMSD) from the initial state in water  $\text{H}_2\text{O}$  (a) and in cyclohexane  $\text{cC}_6\text{H}_{12}$  (b). Panels (c) and (d): radius of gyration  $R_g$  in water  $\text{H}_2\text{O}$  (c) and in cyclohexane  $\text{cC}_6\text{H}_{12}$  (d). Panels (e) and (f): the solvent accessible surface area (SASA) in water  $\text{H}_2\text{O}$  (e) and in cyclohexane  $\text{cC}_6\text{H}_{12}$  (f).

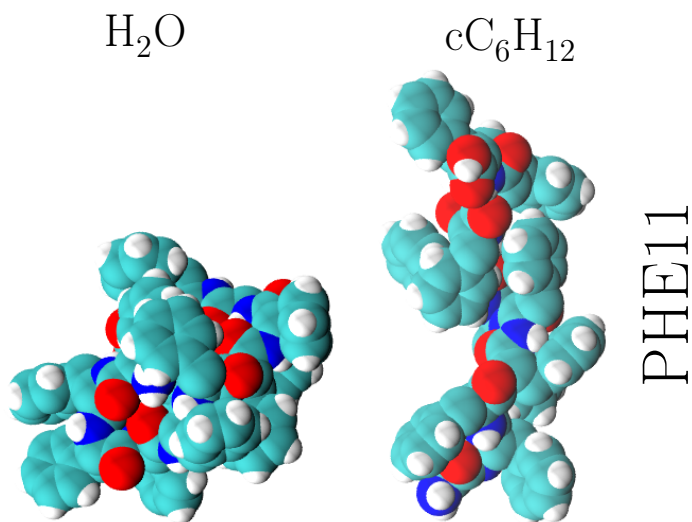

Figure SXV: Representative snapshots of the smallest  $R_g$  conformers i.e. the most collapsed conformations. On the left the structure obtained in water  $\text{H}_2\text{O}$  and on the right the one obtained in cyclohexane  $\text{cC}_6\text{H}_{12}$ .



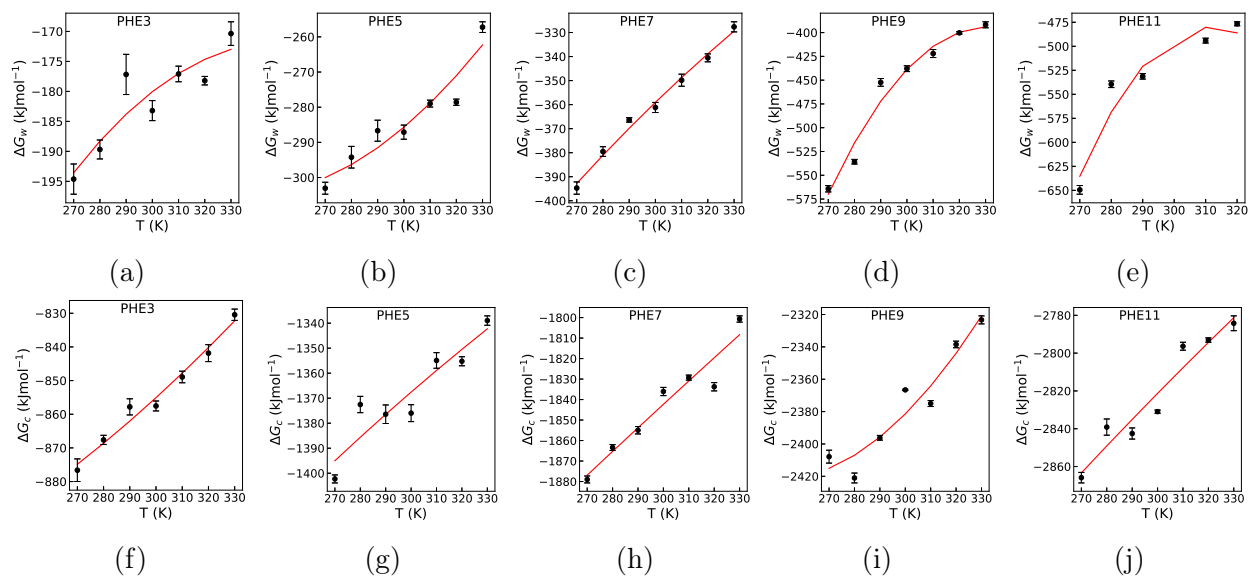

Figure SXVI: Temperature dependence of the solvation free energy  $\Delta G_{solv}$  from gas to water  $H_2O$  (a ··· e) (top) and from gas to cyclohexane  $cC_6H_{12}$  (f ··· j) (bottom) for the bio-polymer poly-phenylalanine oligomer polyPHE.

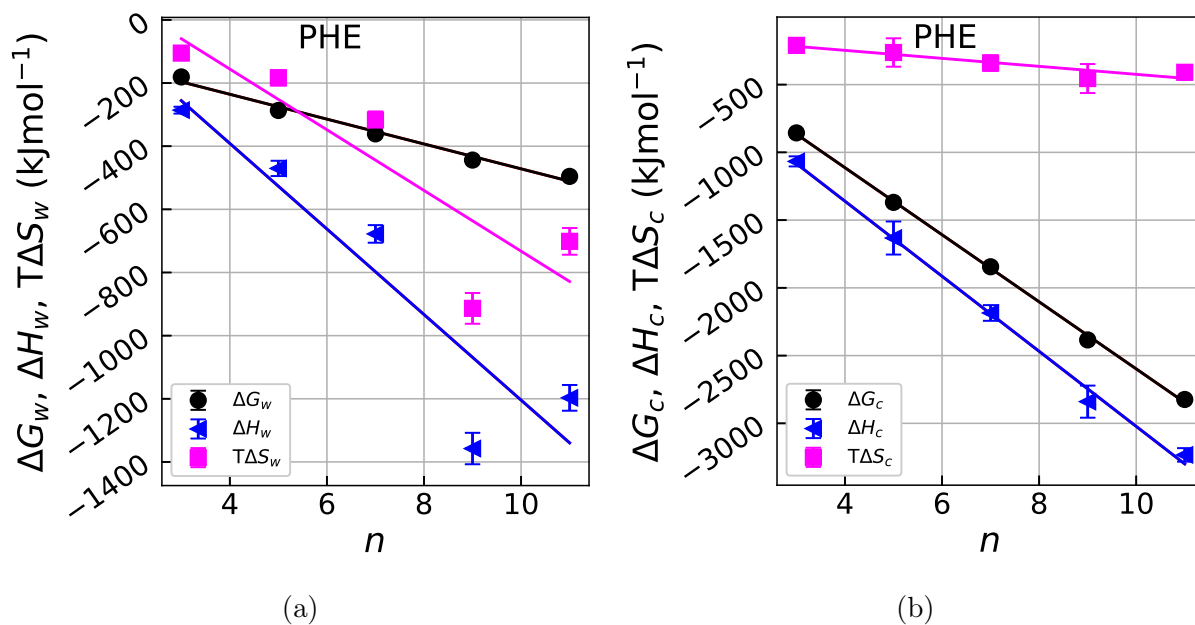

Figure SXVII: Solvation free energy, enthalpy, and entropy ( $\Delta G$ ,  $\Delta H$ ,  $T\Delta S$ ) changes with the polymer chain length  $n$  in  $H_2O$  and in cyclohexane  $cC_6H_{12}$  at 25°C. The continuous lines connecting the points are the representative linear fitting. Negative  $\Delta G$  and  $\Delta H$  represent an energetic gain upon solvation, whereas a negative  $T\Delta S$  represent an entropic loss, upon solvation.

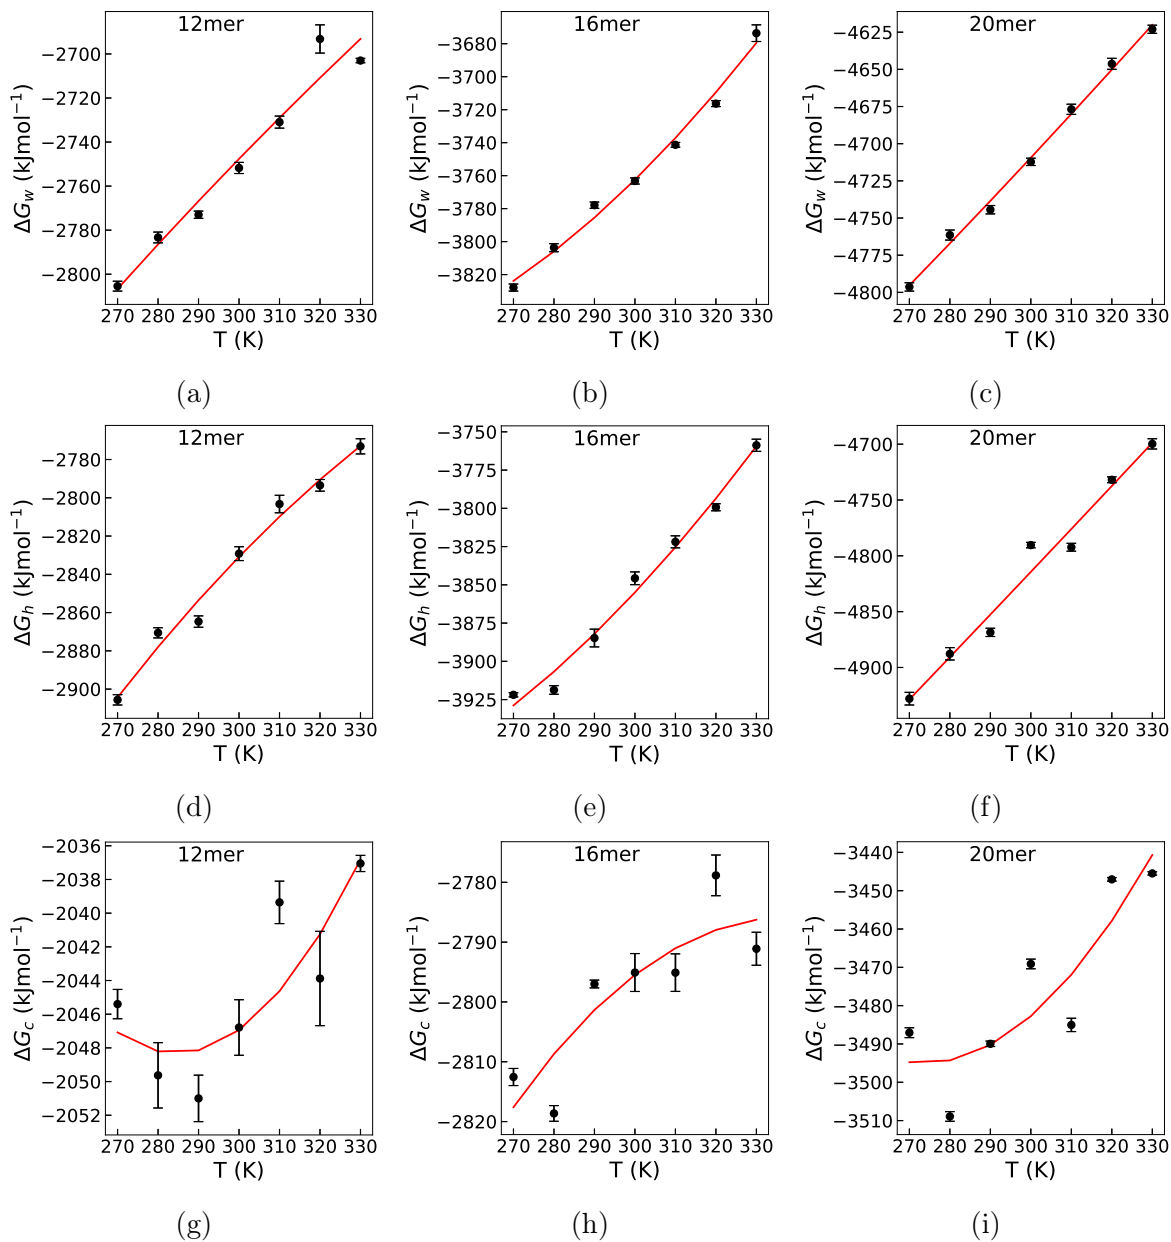

Figure SXVIII: Temperature dependence of the solvation free energy  $\Delta G_{solv}$  from gas to water  $H_2O$  (a ··· c) (top), from gas to n-hexane  $nC_6H_{14}$  (d ··· f) (middle) and from gas to cyclohexane  $cC_6H_{12}$  (g ··· i) (bottom) for the synthetic polymer poly-phenylacetylene foldamer pPA.

## Diffusion constants

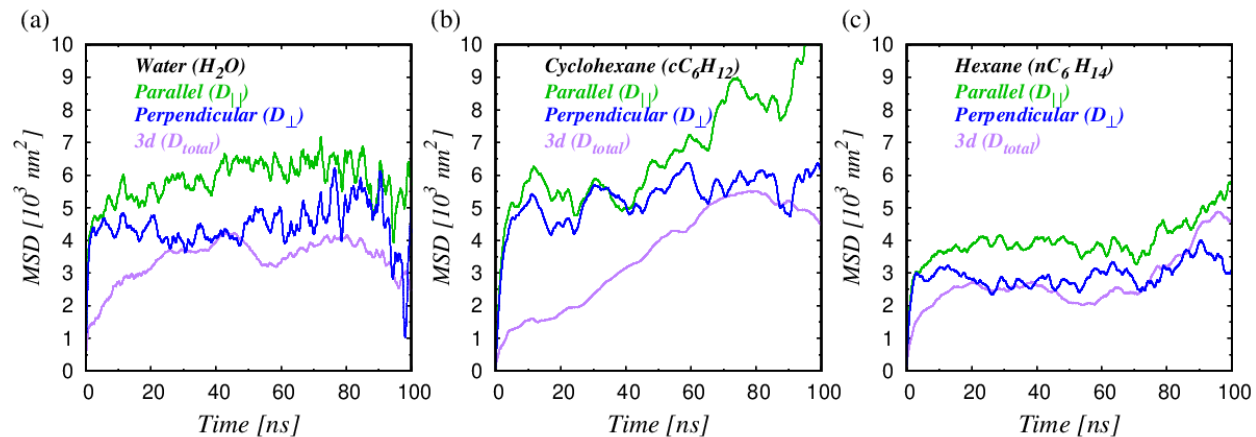

Figure SXIX: Mean square displacements (MSD) of the geometrical centers of 20 aromatic rings mid-points (GC) of pPA polymer (in units of  $10^3 \text{nm}^2$ ) vs time (in  $\text{ns}$ ) for three representative MD simulations of  $20\text{mers}$  solvated in water  $\text{H}_2\text{O}$  (Panel (a)), in cyclohexane  $\text{cC}_6\text{H}_{12}$  (Panel (b)), and in  $n$ -hexane  $\text{nC}_6\text{H}_{14}$  (Panel (c)). In each of the three panels the green lines represent the mean square displacement of GC along the direction parallel to the helical axis, namely  $\langle (\mathbf{R}_{GC,\parallel}(t) - \mathbf{R}_{GC,\parallel}(0))^2 \rangle = 2D_{\parallel}t$ ; while the blue lines represent the MSD of GC along the direction perpendicular to the helical axis,  $\langle (\mathbf{R}_{GC,\perp}(t) - \mathbf{R}_{GC,\perp}(0))^2 \rangle = 4D_{\perp}t$ . Finally the purple lines show the full MSD GC displacements in three dimensions,  $\langle (\mathbf{R}_{GC}(t) - \mathbf{R}_{GC}(0))^2 \rangle = 6D_{\text{tot}}t$ . We note that diffusion is systematically larger along the direction parallel to helical axis with respect to the direction perpendicular to it.

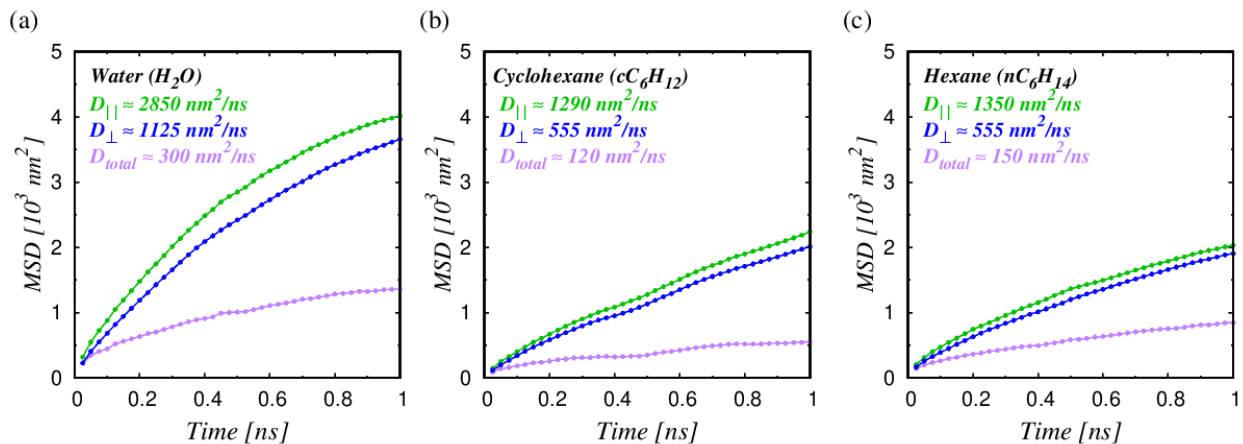

Figure SXX: Mean Square Displacements (MSD) of the geometrical centers of the 20 aromatic rings mid-points (GC) of *20mers* of pPA solvated in water (Panel (a)), in cyclohexane  $cC_6H_{12}$  (Panel (b)), and in *n*-hexane  $nC_6H_{14}$  (Panel (c)), for the initial stages of folding, similar to what is reported above in Figure SXIX. From the linear fits (up to  $\sim 0.3ns$ ) we find the respective values of diffusion coefficients  $D_{||}$ ,  $D_{\perp}$ , and  $D_{tot}$  in the three solvents. By comparing the values of the diffusion coefficients we conclude that diffusion in water is several times faster than in cyclohexane  $cC_6H_{12}$  and *n*-hexane  $nC_6H_{14}$ . Moreover, the diffusion coefficients in cyclohexane  $cC_6H_{12}$  and *n*-hexane  $nC_6H_{14}$  are on the other hand comparable to one another.
